# Supplementary material for: Tandem isomerisation–metathesiscatalytic processes of linear olefins in ionic liquid biphasic system
Source: Royal Society of Chemistry journal article supplement (doi:10.1039/c0cc03891a), 2010-01-01
Supplement: c0cc03891a.pdf [file c0cc03891a.pdf]

Supporting Information for

## Tandem Isomerisation-Metathesis Catalytic Processes of Linear Olefins in Ionic liquid Biphasic System

Crestina S. Consorti, Guilherme L. P. Aydos and Jairton Dupont

### Experimental

**General Remarks.** All manipulation of complexes were conducted under Ar using dry-boxes or standard Schlenk techniques. Chemicals were treated as follows: 1-hexene (Acros) and toluene, distilled from Na/benzophenone; *trans*-3-hexene, PdCl<sub>2</sub>(NCPPh)<sub>2</sub>, propylbenzene, ((1,3-bis(mes)H<sub>2</sub>Im)(PCy<sub>3</sub>)(Cl)<sub>2</sub>Ru(=CHPh) **2**, and Ru<sub>3</sub>(CO)<sub>12</sub> (all from Aldrich); acetone-d<sub>6</sub>, benzene-d<sub>6</sub>, CDCl<sub>3</sub> (Cambridge Isotope) and other solvents, used as received. RuHCICO(PPh<sub>3</sub>)<sub>3</sub>,<sup>1</sup> RuHCICO(PCy<sub>3</sub>)<sub>3</sub>,<sup>2</sup> **4**,<sup>3</sup> **5**,<sup>4</sup> IIs (BMI.PF<sub>6</sub> and DMI.PF<sub>6</sub>)<sup>5</sup> were synthesized according to literature procedures. GC analyses were performed using an Agilent 6820 instrument equipped with a capillary column (DB-17–0.25 mm; 25 m S 0.32 mm). GC-MS data were recorded with a Shimadzu QP2010.

**Typical isomerisation procedure.** The isomerisation catalyst (2 mmol) was charged in a Schlenk flask and maintained under vacuum for 30 min. A solution of 1-hexene (0.5 mL, ≈ 4 mmol) in toluene was introduced into the reaction system by syringe and the mixture was stirred at 45 °C for 24 hours. Samples were taken periodically for GC analysis.

**Typical tandem metathesis/isomerization.** Toluene (4 g), *trans*-3-hexene (0,5 mL, ≈ 4 mmol) and propylbenzene (30 mg) as internal standard were charged into a Schlenk flask under Ar. A sample was taken to CG analyses. In a glove box a second Schlenk was loaded with both, metathesis (0.01 mmol) and isomerisation (0.02 mmol) catalysts. For reactions conducted with IL as co-solvent, IL (500 mg) was added to the system at this point. The toluene solution was transferred to the flask containing the catalysts mixture via syringe. A

vertical condenser followed by a oil bubbler was fitted in the reactor flask and the reaction was vigorously stirred at 45 °C for 24 hours. Samples were periodically removed from the organic phase for GC analysis. The products mixture was hydrogenated with Pd/C and H<sub>2</sub> (4 atm) in a Fisher-Porter bottle, analysed by GC-MS. Peaks were assigned by comparison with authentic alkane standards.

### Typical Chromatograms

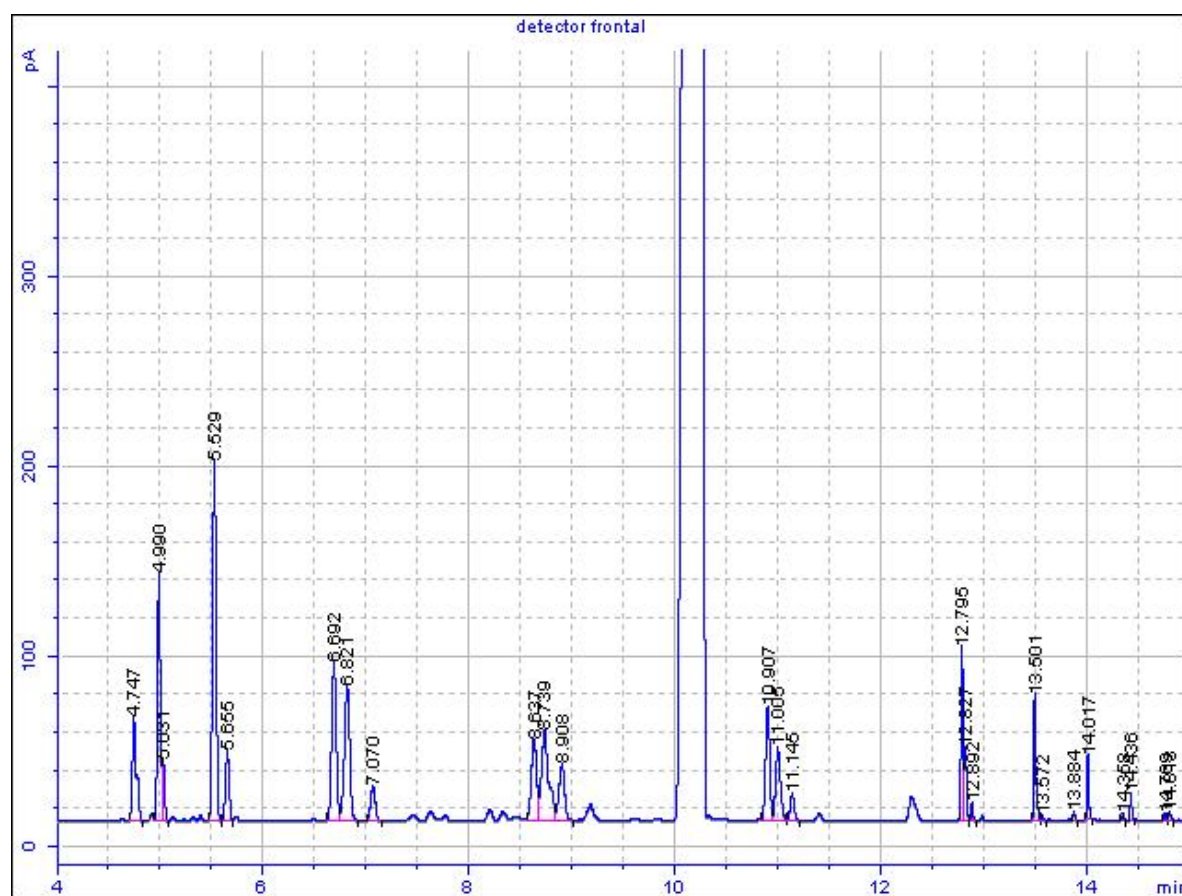

**Figure 1.** GC analysis. Reaction conditions: *trans*-3-hexene (2 mmol), toluene (4mL), **5** (0.01 mmol), RuHClCO(PPh<sub>3</sub>)<sub>3</sub> (0.02 mmol), 45 °C, 24 h.

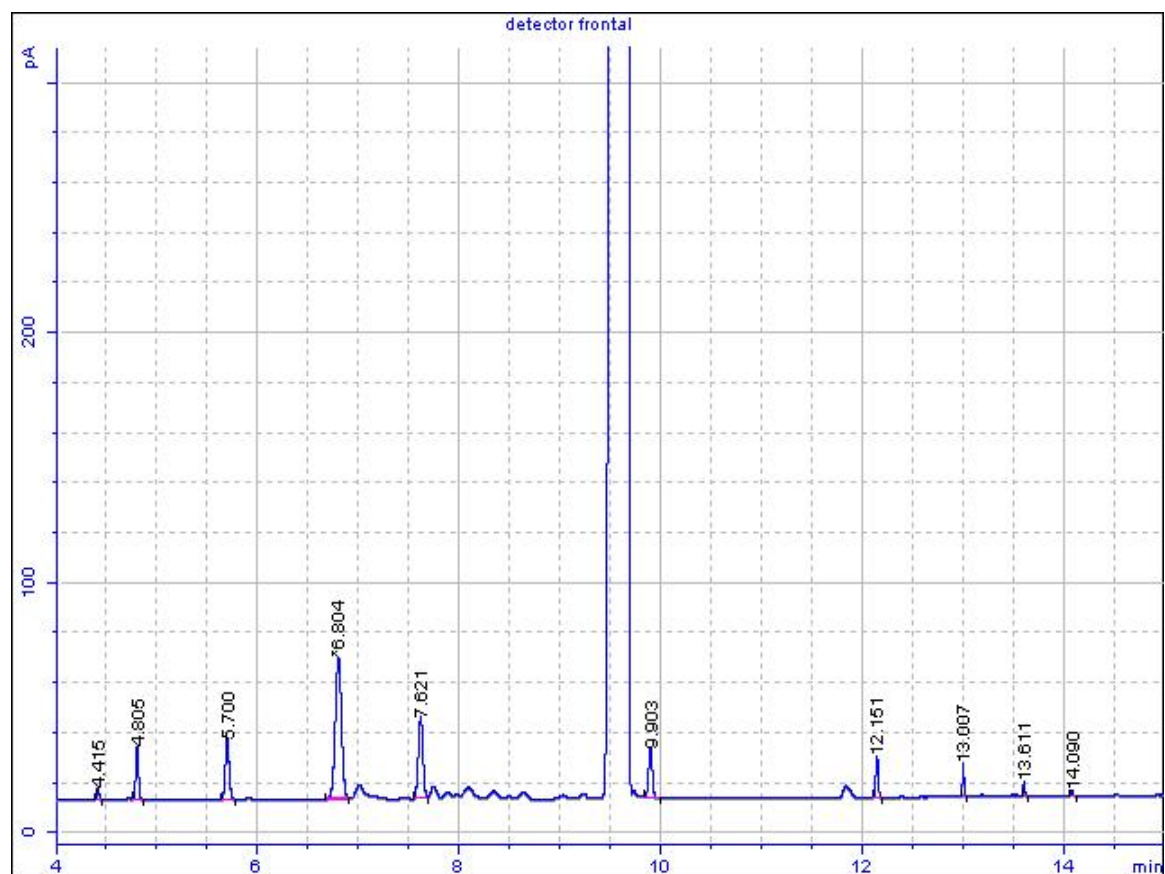

**Figure 2.** GC analysis after hydrogenation. Reaction conditions: *trans*-3-hexene (2 mmol), toluene (4mL), **5** (0.01 mmol), RuHClCO(PPh<sub>3</sub>)<sub>3</sub> (0.02 mmol), 45 °C, 24 h.

1. N. Ahmad, J. J. Levison, S. D. Robinson, M. F. Uttlky, E. R. Wonchoba and G. W. Parshall, in *Inorg. Synth.*, ed. W. P. George, McGraw-Hill, 1974, vol. XV, pp. 45-64.
2. N. J. Beach, U. L. Dharmasena, S. D. Drouin and D. E. Fogg, *Adv. Synth. Catal.*, 2008, **350**, 773-777.
3. C. S. Consorti, G. L. P. Aydos, G. Ebeling and J. Dupont, *Org. Lett.*, 2008, **10**, 237-240.
4. C. S. Consorti, G. L. P. Aydos and G. Ebeling, *Organometallics*, 2009, **28**, 4527-4533.
5. C. C. Cassol, G. Ebeling, B. Ferrera and J. Dupont, *Adv. Synth. Catal.*, 2006, **348**, 243-248.
